# Supplementary figures and images for: WDR60-mediated dynein-2 loading into cilia powers retrograde IFT and transition zone crossing
Source: PubMed Central journal article supplement — J Cell Biol. 2021 Nov 5;221(1):e202010178. doi: 10.1083/jcb.202010178 (PMC8576871; doi:10.1083/jcb.202010178), 2021-11-05

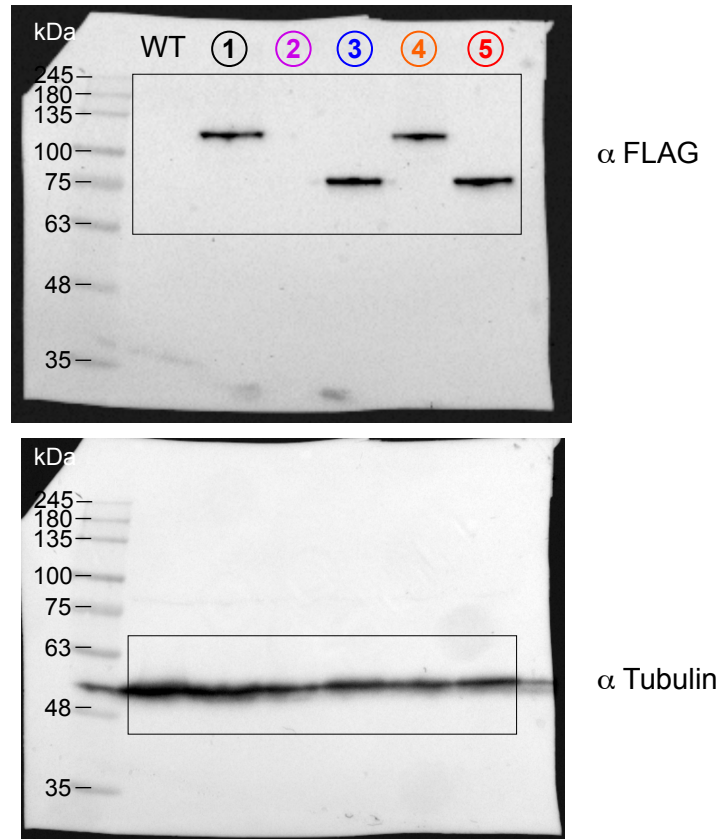

- ① WDR-60::3xFLAG::GFP
- ② *wdr-60(null)::3xflag::gfp*
- ③ WDR-60( $\Delta$ CT)::3xFLAG::GFP
- ④ *xbx-1(null)*
- ⑤ WDR-60( $\Delta$ CT)::3FLAG::GFP;*xbx-1(null)*

Supplement: JCB_202010178_SourceDataF2.pdf [file JCB_202010178_SourceDataF2.pdf]
